# Supplementary material
Source: PubMed Central journal article supplement (PMC2708889)
Supplement: supp_M809577200_Epi_Sfigs-JBC-3.pdf [file supp_M809577200_Epi_Sfigs-JBC-3.pdf]

## Supplementary material

### Supplementary Table I. Disaccharide composition of CS/DS chains in WT and *Hsepi* mutant MEFs

<sup>35</sup>S-labeled CS/DS were isolated from cellular lysates as outlined in “Experimental Procedures”. Disaccharides obtained after complete digestion of chains by chondroitinase ABC were separated on a CarboPac PA-1 HPCL column and quantified by liquid scintillation counting. Results are expressed as proportion of each disaccharide species.

| Disaccharide unit \ Hsepi genotype | WT   | <i>Hsepi</i> <sup>-/-</sup> |
|------------------------------------|------|-----------------------------|
|                                    | %    | %                           |
| ΔHexU-GalNAc4S                     | 95.5 | 96.3                        |
| ΔHexU-GalNAc6S                     | 2.7  | 2.3                         |
| ΔHexU-GalNAc4,6diS                 | 0.0  | 0.0                         |
| ΔHexU2S-GalNAc4S                   | 1.5  | 1.1                         |
| ΔHexU2S-GalNAc6S                   | 0.3  | 0.3                         |

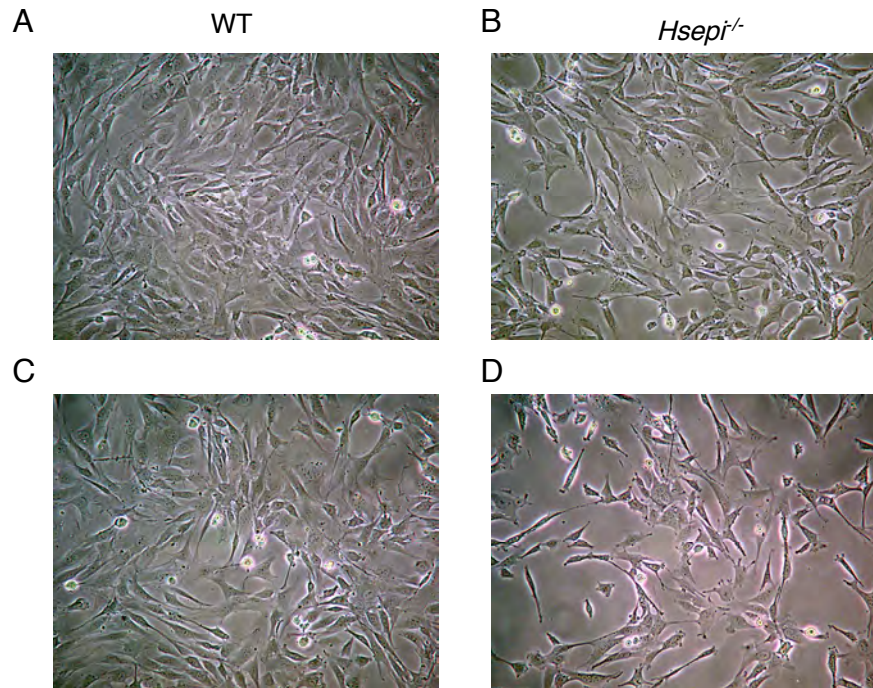

Fig. S1. Morphology of MEF cells.

MEF cells were isolated from WT and *Hsepi*<sup>-/-</sup> embryos. (A, B) Cells seeded at a density of 4 x 10<sup>5</sup> in 6-well plate were cultured for 24 hours; (C, D) Cells seeded at a density of 1 x 10<sup>5</sup> in 6-well plate were cultured for 72 hours.

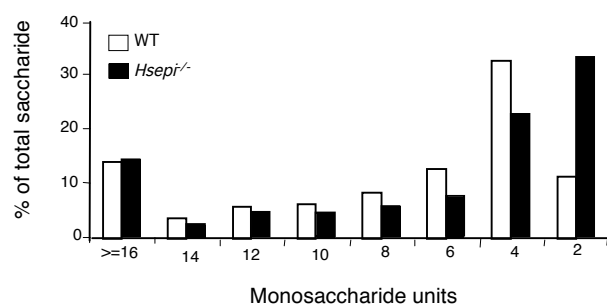

Fig. S2. Proportions of oligosaccharides generated by deaminative cleavage of WT and *Hsepi*<sup>-/-</sup> HS samples  
 Data are based on areas of the peaks shown in Fig. 2C.

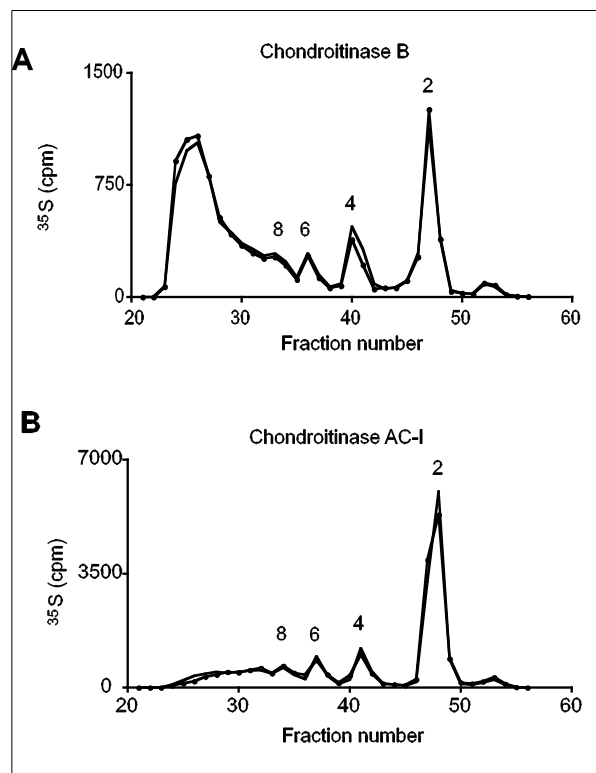

Fig. S3. Amount and distribution of IdoA in CS/DS derived from MEF lysates.  
 MEF were metabolically labelled, and cellular CS/DS chains were isolated. The products after chondroitinase B (A) or chondroitinase AC-I (B) digestion were size fractionated on Superdex Peptide column. WT (*line*), *Hsepi*<sup>-/-</sup> (*filled circle*).

Jia et al

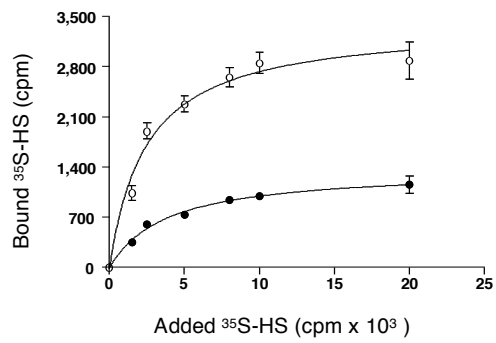

**Fig. S4. Interactions of HS from MEF with FGF2**

Metabolically  $^{35}\text{S}$ -labeled HS from WT (*empty circle*) and  $Hsepi^{-/-}$  (*filled circle*) MEF were incubated with 50 ng FGF2 for 2 hours. Bound HS was trapped on a nitrocellulose filter and recovered for radioisotope counting (see “Experimental Procedures”). Data shown represent 4 independent experiments (means  $\pm$  s.d.).

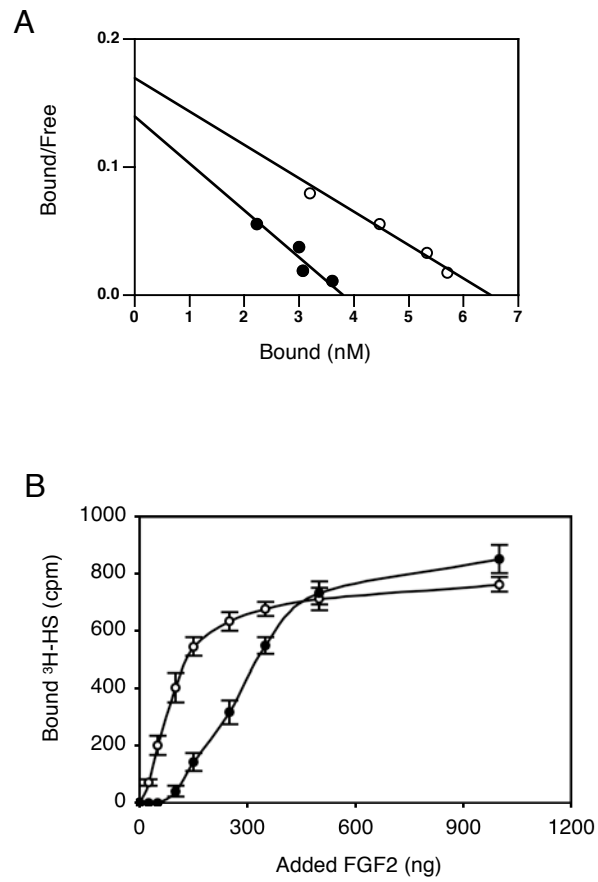

Fig. S5. Interactions of HS with FGF2

(A) Scatchard-plot of Fig. 6A by GraphPad Prism Software. (B) Saturation binding curve (*empty circle*) and *Hsep1<sup>-/-</sup>* (*filled circle*).
